# Supplementary material for: Effect of Magnetic Resonance Imaging at 1.5 T and 3 T on Temperature and Bond Strength of Orthodontic Bands with Welded Tubes: An In Vitro Study
Source: MDPI journal article supplement (doi:10.3390/ma16020651), 2023-01-09
Supplement: s1 [file s1]

# Effect of Magnetic Resonance Imaging at 1.5 T and 3 T on Temperature and Bond Strength of Orthodontic Bands with Welded Tubes: An In Vitro Study

Maria Francesca Sfondrini <sup>1</sup>, Simone Gallo <sup>1,\*</sup>, Maurizio Pascadopoli <sup>1,\*</sup>, Cinzia Rizzi <sup>1</sup>, Andrea Boldrini <sup>1</sup>, Simone Santagostini <sup>2</sup>, Luca Anemoni <sup>3</sup>, Maria Sole Prevedoni Gorone <sup>2</sup>, Lorenzo Preda <sup>2,4</sup>, Paola Gandini <sup>1</sup> and Andrea Scribante <sup>1</sup>

**Table S1.** Parameters of 1.5T RMI.

|                          | T2-TSE<br>Axial    | T1-TSE<br>Axial    | T2-TSE<br>Coronal  | T2-FL2D<br>Axial   | EP2D<br>7B Axial   | T2-FLAIR<br>Axial  | T1-VIBE<br>Axial   |
|--------------------------|--------------------|--------------------|--------------------|--------------------|--------------------|--------------------|--------------------|
| FOV (mm)                 | 240                | 240                | 180                | 210                | 340                | 240                | 240                |
| Voxel size (mm)          | 0.5 × 0.5 ×<br>3.0 | 0.5 × 0.5 ×<br>3.0 | 0.6 × 0.6 ×<br>2.0 | 0.5 × 0.5 ×<br>3.0 | 1.1 × 1.1 ×<br>4.0 | 0.5 × 0.5 ×<br>3.0 | 0.6 × 0.6 ×<br>0.6 |
| Slice Thickness          | 3.0                | 3.0                | 2.0                | 3.0                | 4.0                | 3.0                | 0.6                |
| Slices                   | 52                 | 52                 | 39                 | 45                 | 20                 | 20                 | /                  |
| TE (ms)                  | 108                | 8.6                | 79                 | 25                 | 81                 | 94                 | 2.46               |
| TR (ms)                  | 5410               | 739                | 7630               | 1440               | 4900               | 4860               | 5.35               |
| Scan time (min:s)        | 03:27              | 02:16              | 02:26              | 06:29              | 04:34              | 07:27              | 04:32              |
| SAR whole body<br>(W/kg) | 1                  | 1                  | 1                  | 1                  | 1                  | 1                  | 1                  |

Legend: T2 weighted turbo spin echo in axial projection (T2W-TSE AXIAL), T2 weighted turbo spin echo in coronal projection (T2W-TSE CORONAL), T2 fluid attenuated inversion recovery in axial projection (T2-FLAIR AXIAL), and T1 volumetric interpolated breath-hold examination in three dimensions fat saturated (T1 VIBE 3D FS); field of view (FOV), time of echo (TE), repetition time (TR), and specific absorption rate (SAR) of the whole body.

**Table S2.** Parameters of 3T RMI.

|                          | <b>T2-TSE<br/>Axial</b> | <b>T1-TSE<br/>Axial</b> | <b>T2-TSE<br/>Coronal</b> | <b>T2-FL2D<br/>HEMO<br/>Axial</b> | <b>EP2D DIFF<br/>7B VALUE<br/>Axial</b> | <b>T2-FLAIR<br/>Axial</b> | <b>T1-VIBE<br/>3D FS<br/>Axial</b> |
|--------------------------|-------------------------|-------------------------|---------------------------|-----------------------------------|-----------------------------------------|---------------------------|------------------------------------|
| FOV (mm)                 | 240                     | 240                     | 180                       | 240                               | 230                                     | 240                       | 240                                |
| Voxel size (mm)          | 0.5 × 0.5 ×<br>3.0      | 0.3 × 0.3 ×<br>3.0      | 0.6 × 0.6 ×<br>2.0        | 0.5 × 0.5 ×<br>3.0                | 1.1 × 1.1 ×<br>4.0                      | 0.5 × 0.5 ×<br>3.0        | 0.6 × 0.6 ×<br>0.6                 |
| Slice Thickness          | 3.0                     | 3.0                     | 2.0                       | 3.0                               | 4.0                                     | 3.0                       | 0.6                                |
| Slices                   | 52                      | 52                      | 39                        | 45                                | 20                                      | 40                        | /                                  |
| TE (ms)                  | 104                     | 10                      | 75                        | 12                                | 58                                      | 90                        | 2.48                               |
| TR (ms)                  | 6260                    | 689                     | 7630                      | 801                               | 3300                                    | 8000                      | 5.30                               |
| TIR (ms)                 | /                       | /                       | /                         | /                                 | /                                       | 2368                      |                                    |
| Scan time<br>(min:s)     | 03:09                   | 02:52                   | 02:26                     | 03:11                             | 03:02                                   | 02:56                     | 04:26                              |
| SAR whole<br>body (W/kg) | 1                       | 1                       | 0.9                       | 0.9                               | 0.9                                     | 0.8                       | 0.7                                |

Legend: T2 weighted two-dimensional fast low angle shot for hemosiderin detection in axial projection (T2W-FL2D HEMO AXIAL), T2 weighted turbo inversion recovery magnitude in axial projection (T2W-TIRM AXIAL), two-dimensional echo planar with 5 mm slice diffusion in axial projection (EP2D DIFF 5 mm AXIAL), 2 dimensional echo planar with 3 mm slice diffusion in axial projection (EP2D DIFF 3 mm AXIAL), and proton density weighted in axial projection (PDw AXIAL); field of view (FOV), time of echo (TE), repetition time (TR), turbo inversion recovery (TIR), and specific absorption rate (SAR) of the whole body.
